# Supplementary material for: Effectiveness of Dengue Awareness Calendar on Indigenous Population: Impact on Knowledge, Belief and Practice
Source: MDPI journal article supplement (doi:10.3390/healthcare11050637), 2023-02-21
Supplement: s1 [file s1]

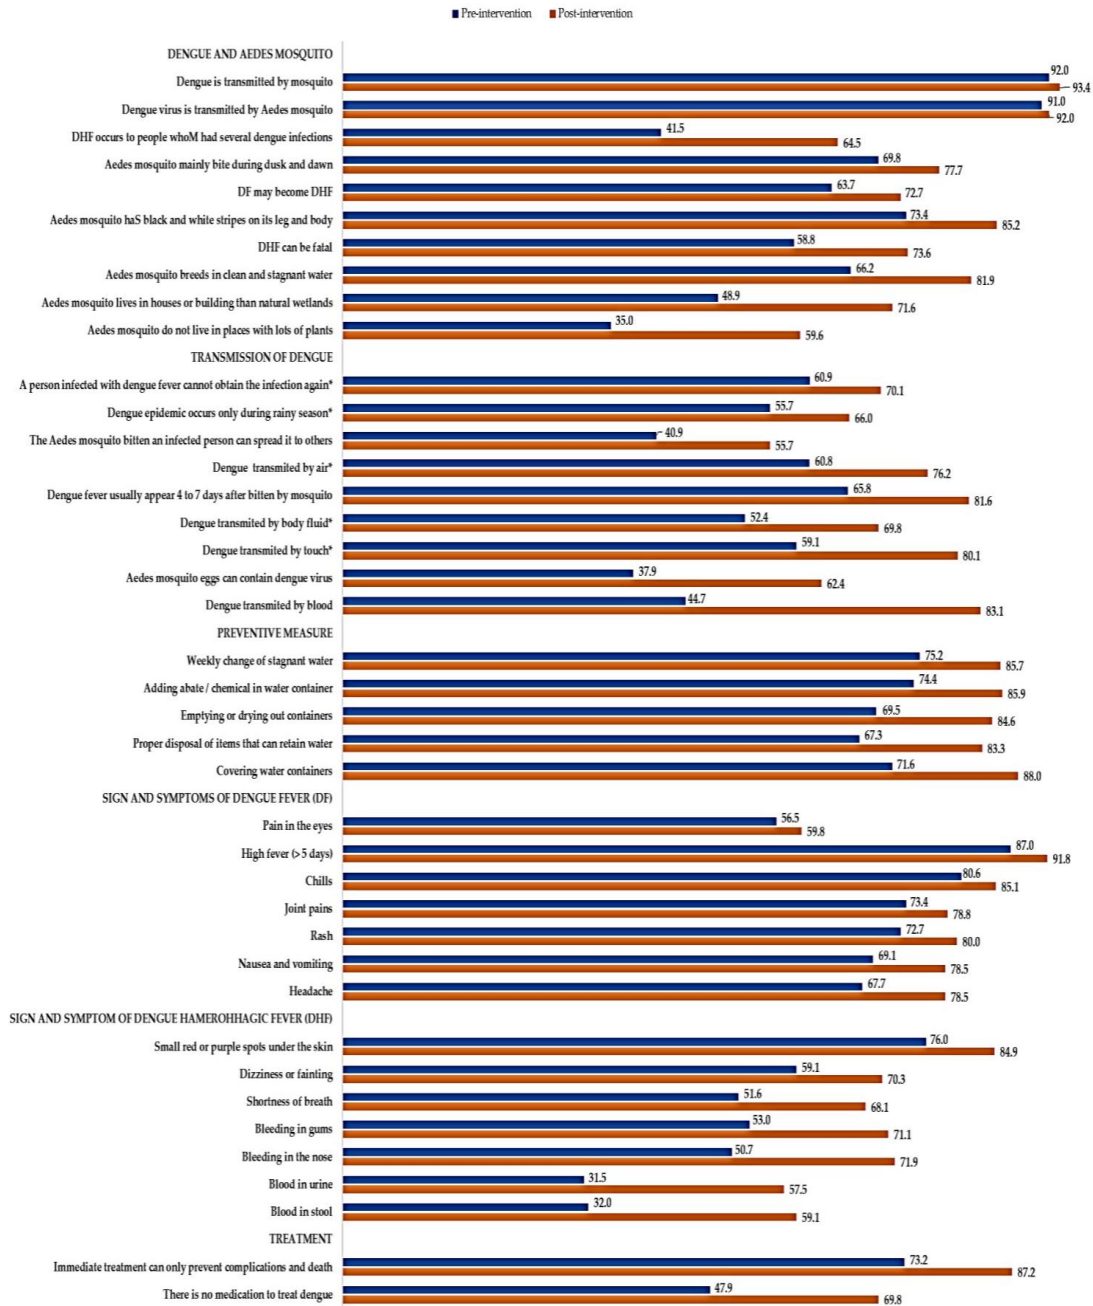

Figure S2: The percentage of correct responses of dengue knowledge items pre- and post-intervention (N= 609)
