# Supplementary material for: Effectiveness of Dengue Awareness Calendar on Indigenous Population: Impact on Knowledge, Belief and Practice
Source: Healthcare (Basel). 2023 Feb 21;11(5):637. doi: 10.3390/healthcare11050637 (PMC10000413; doi:10.3390/healthcare11050637)
Supplement: Supplementary file 1 [file healthcare-11-00637-s001.zip]

Archive with 4 entries (4 files):
- Figure S1 Dengue Awareness Calendar.pdf
- Figure S2 The percentage of correct responses of dengue knowledge items pre- and post-intervention .pdf
- Figure S3 Proportion of ‘Often practiced’ for dengue prevention practices pre- and post-intervention.pdf
- File S1 Survey Questionnaire.pdf
