# Supplementary figures and images for: Effectiveness of Dengue Awareness Calendar on Indigenous Population: Impact on Knowledge, Belief and Practice
Source: MDPI journal article supplement (doi:10.3390/healthcare11050637), 2023-02-21

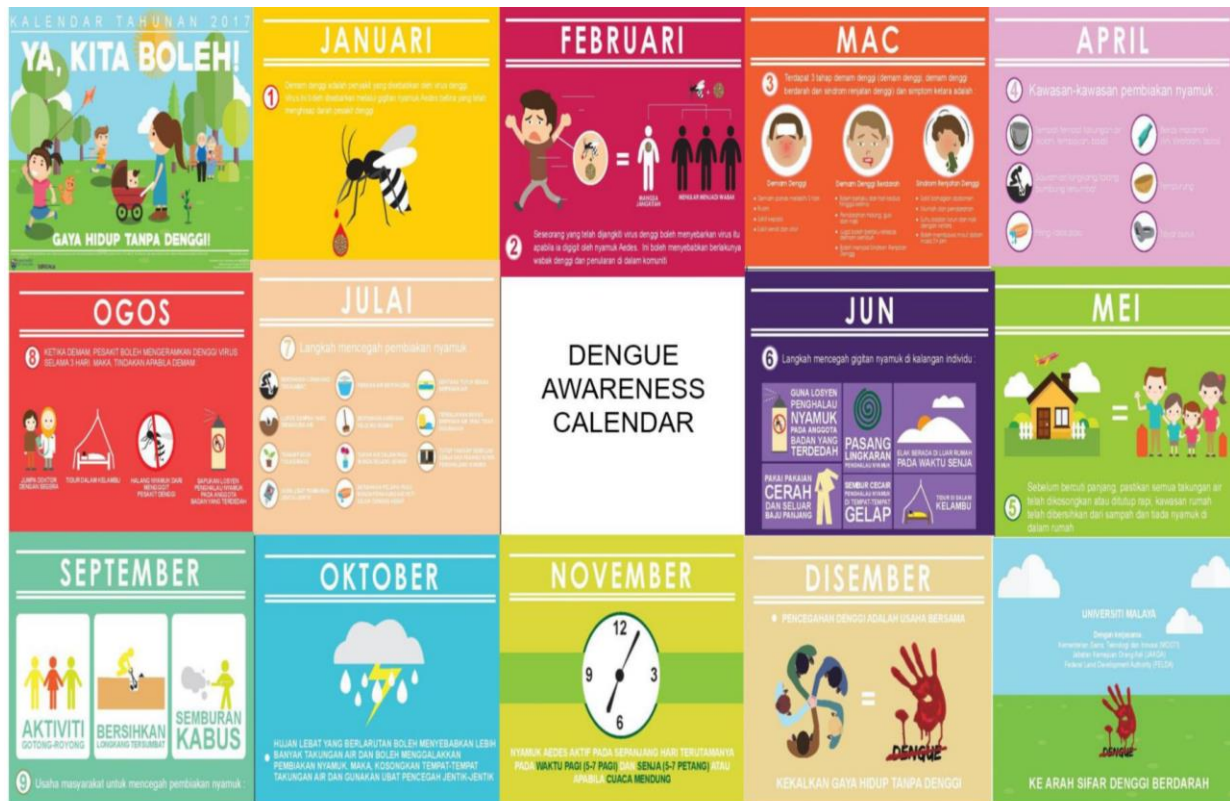

Figure S1: Dengue Awareness Calendar

Supplement: s1 [file s1]
